# Supplementary material for: Periodic trends in the structural, electronic, and transport properties of electrenes
Source: Royal Society of Chemistry journal article supplement (doi:10.1039/d3nr00304c), 2023-01-01
Supplement: d3nr00304c1.pdf [file d3nr00304c1.pdf]

# Periodic trends in the structural, electronic and transport properties of electrenes

Mohammad Rafiee Diznab,<sup>†</sup> Erin R. Johnson,<sup>\*,†,‡</sup> and Jesse Maassen<sup>\*,†</sup>

<sup>†</sup>*Department of Physics and Atmospheric Science, Dalhousie University, Halifax, Nova Scotia B3H 4R2, Canada*

<sup>‡</sup>*Department of Chemistry, Dalhousie University, Halifax, Nova Scotia B3H 4R2, Canada*

E-mail: erin.johnson@dal.ca; jmaassen@dal.ca

## 1 Landauer transport formalism

### 1.1 Mathematical expressions

The electrical conductivity within a Landauer transport framework<sup>1</sup> can be defined as

$$\sigma = \left( \frac{2q^2}{h} \right) I_0, \quad (1)$$

where  $\sigma$  is the electrical conductivity,  $q$  is carrier charge,  $h$  is Planck's constant and the quantity  $I_0$  is written as

$$I_0 = \frac{h}{2} \int_{-\infty}^{+\infty} \Sigma(E) \left( -\frac{\partial f_0}{\partial E} \right) dE, \quad (2)$$

where  $\Sigma(E)$  is the transport distribution as a function of energy,  $E$ ,  $\mu$  is the Fermi level,  $k_B$  is Boltzmann's constant,  $T$  is temperature, and  $f_0$  is the Fermi-Dirac distribution. The

transport distribution function can be expressed as

$$\Sigma(E) = \frac{1}{\Omega} \sum_{k,s,n} \nu_x^2(k) \tau(k) \delta[E - \epsilon(k)],^1 \quad (3)$$

where the sum runs over all  $k$  points in the Brillouin zone, spin states  $s$ , and band index  $n$ . Here,  $\Omega$  is the sample volume,  $\epsilon(k)$  is the electronic dispersion (i.e. band structure),  $\tau(k)$  is the scattering time and  $\nu_x = 1\hbar(\partial\epsilon/\partial k_x)$  is the group velocity along the direction of transport (here assumed to be the  $\hat{x}$  direction). Since  $\Sigma(E)$  contains all material properties, it is considered the central quantity in these calculations.

Next, we re-arrange  $\Sigma(E)$  to express it as the product of two physically-intuitive quantities, the distribution-of-modes ( $M(E)$ ) and mean-free-path for backscattering ( $\lambda(E)$ ). The resulting  $\Sigma(E)$  is

$$\Sigma(E) = \frac{2}{h} M(E) \lambda(E). \quad (4)$$

From a physical perspective, the distribution-of-modes (or DOM) represents the number of conducting channels available for transport, and is defined as

$$M(E) = \frac{h}{4\Omega} \sum_{k,s,n} |\nu_x(k)| \delta[E - \epsilon(k)]. \quad (5)$$

The other physically descriptive quantity is the mean-free-path for backscattering.  $\lambda(E)$ , which quantifies the average distance along the transport direction before the  $\nu_x$  component of electrons changes sign due to scattering, and is defined as

$$\lambda(E) = 2 \frac{\sum_{k,s,n} \nu_x^2(k) \tau(k) \delta[E - \epsilon(k)]}{\sum_{k,s,n} |\nu_x(k)| \delta[E - \epsilon(k)]}. \quad (6)$$

Since the relaxation time is assumed to be a function of energy in this work, we can write

---

<sup>1</sup>Note that the explicit  $s$  and  $n$  dependence of the quantities in Eq. (3) is omitted for clarity.

## Supporting Information

---

the  $\lambda(E)$  as a product of the average velocity of carriers,  $V_\lambda$ , and the relaxation time,  $\tau(E)$ :

$$\lambda(E) = V_\lambda(E) \tau(E), \quad (7)$$

where  $V_\lambda$  is defined as

$$V_\lambda(E) = 2 \frac{\sum_{k,s,n} \nu_x^2(k) \delta[E - \epsilon(k)]}{\sum_{k,s,n} |\nu_x(k)| \delta[E - \epsilon(k)]}. \quad (8)$$

In this case, the transport distribution takes on the following form

$$\Sigma(E) = \frac{2}{h} M(E) V_\lambda(E) \tau(E). \quad (9)$$

The scattering rates is assumed to be proportional to the DOS, such that  $\tau(E) = k_0 / D(E)$ , so the transport distribution can be expressed as

$$\Sigma_{DOS}(E) = \frac{2}{h} M(E) V_\lambda(E) \frac{k_0}{D(E)}, \quad (10)$$

where  $k_0$  is an adjustable parameter.

## 1.2 Density of states, average velocity, and distribution of modes

The calculated electronic density of states,  $D(E)$ , averaged carrier velocities,  $\langle v_x^+ \rangle$ , and distribution of modes,  $M(E)$ , for all monolayer and bilayer electrenes can be found in Fig. S1-S4. The plotted average velocity is defined as

$$\langle v_x^+ \rangle = \frac{\sum_{k,s,n} |\nu_x(k)| \delta[E - \epsilon(k)]}{\sum_{k,s,n} \delta[E - \epsilon(k)]}. \quad (11)$$

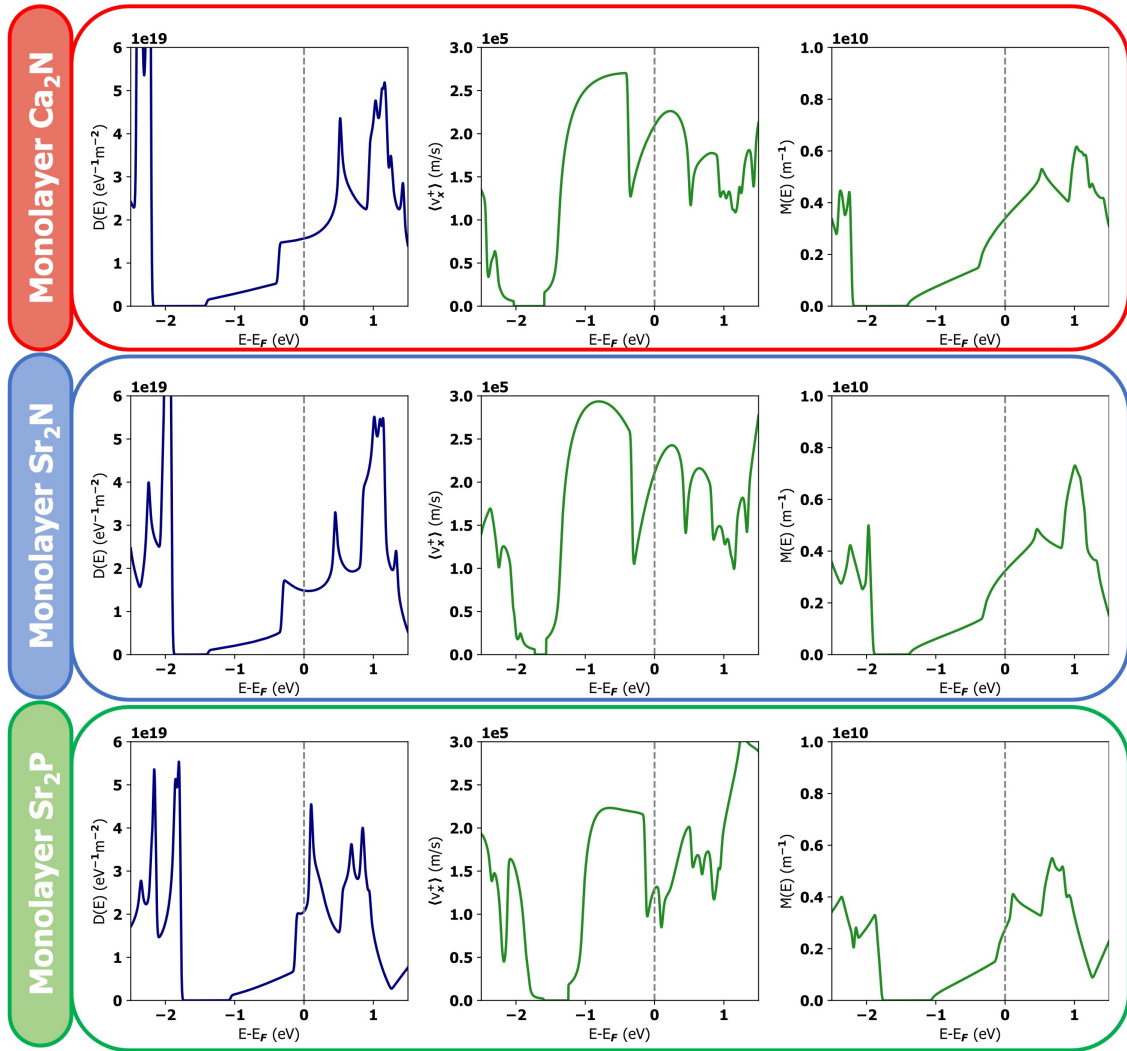

Fig. S1: Calculated DOS (left), averaged velocity (center), and DOM (right) for monolayer  $\text{Ca}_2\text{N}$ ,  $\text{Sr}_2\text{N}$  and  $\text{Sr}_2\text{P}$ .

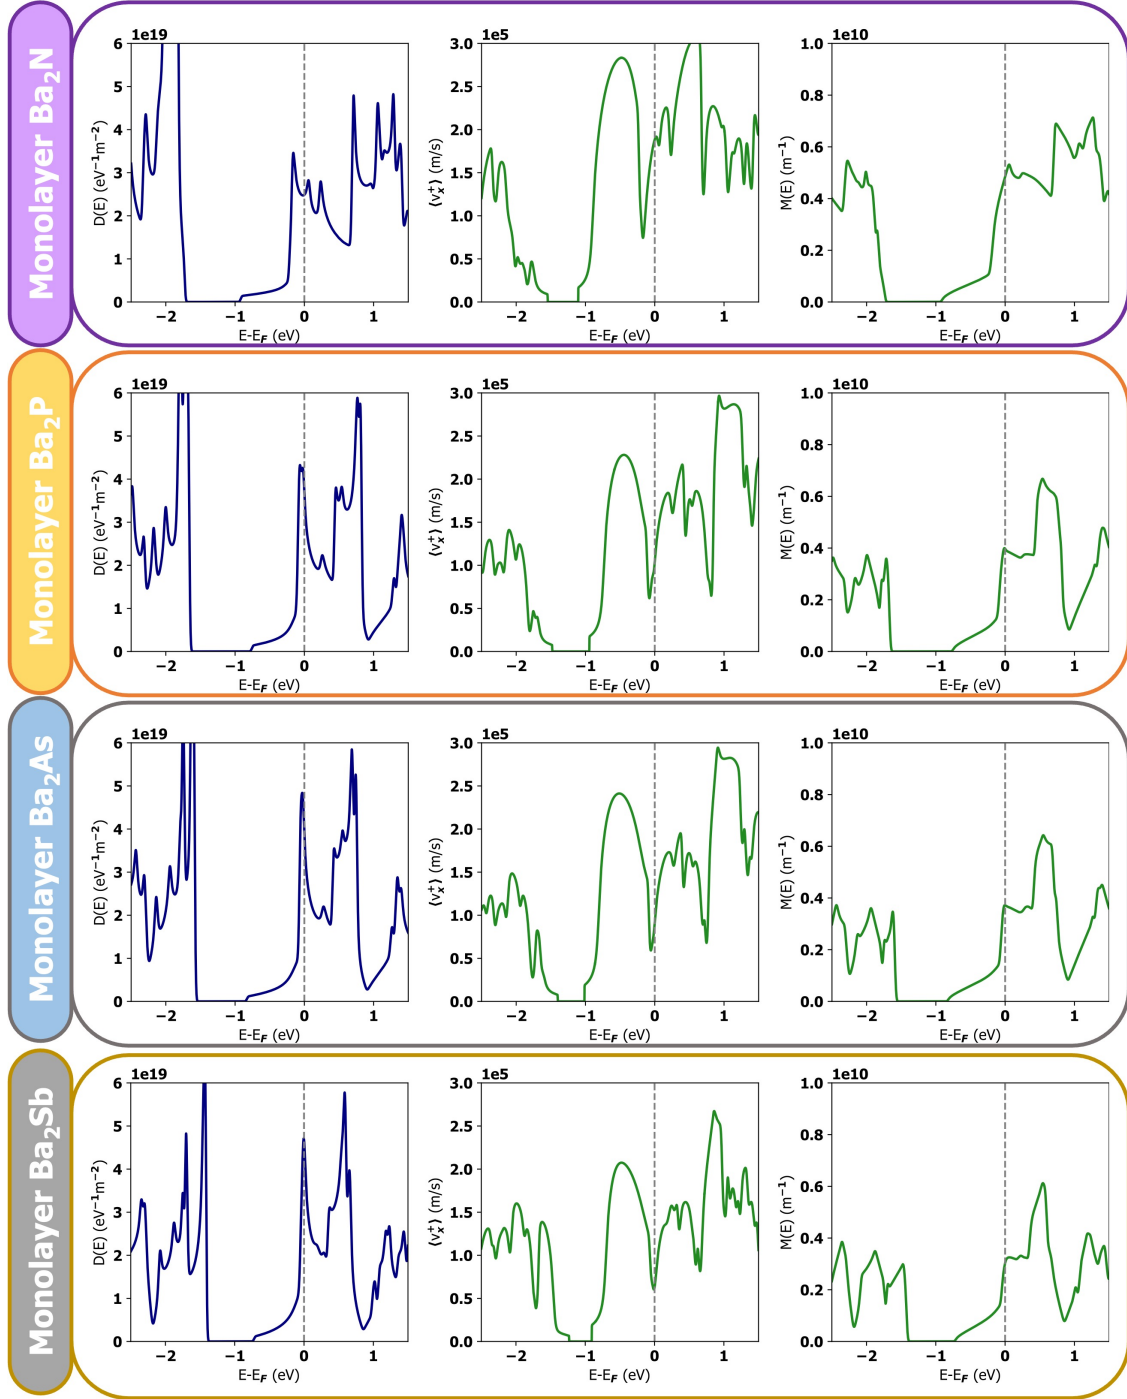

Fig. S2: Calculated DOS (left), averaged velocity (center), and DOM (right) for monolayer  $\text{Ba}_2\text{N}$ ,  $\text{Ba}_2\text{P}$ ,  $\text{Ba}_2\text{As}$  and  $\text{Ba}_2\text{Sb}$ .

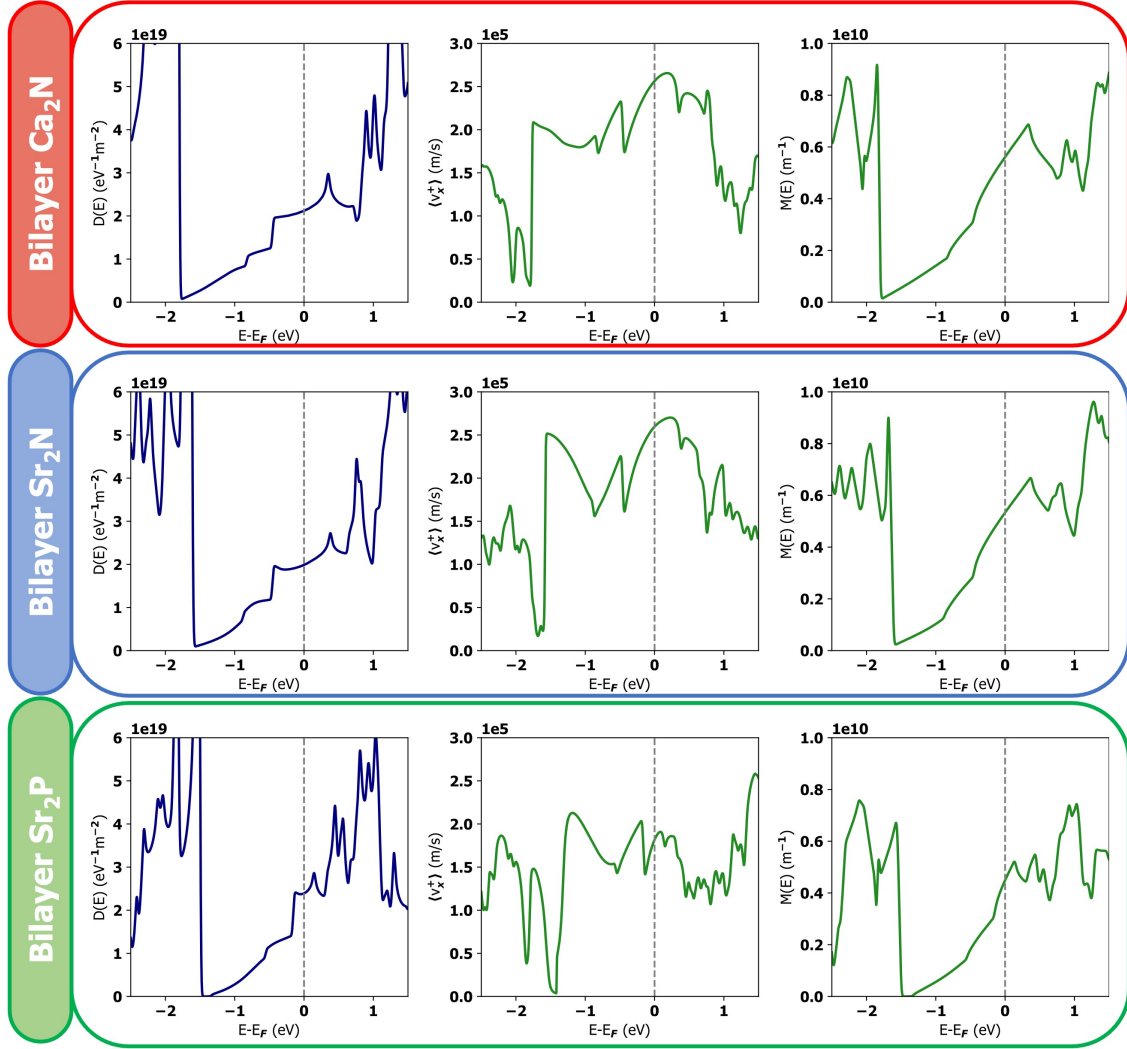

Fig. S 3: Calculated DOS (left), averaged velocity (center), and DOM (right) for bilayer  $\text{Ca}_2\text{N}$ ,  $\text{Sr}_2\text{N}$  and  $\text{Sr}_2\text{P}$ .

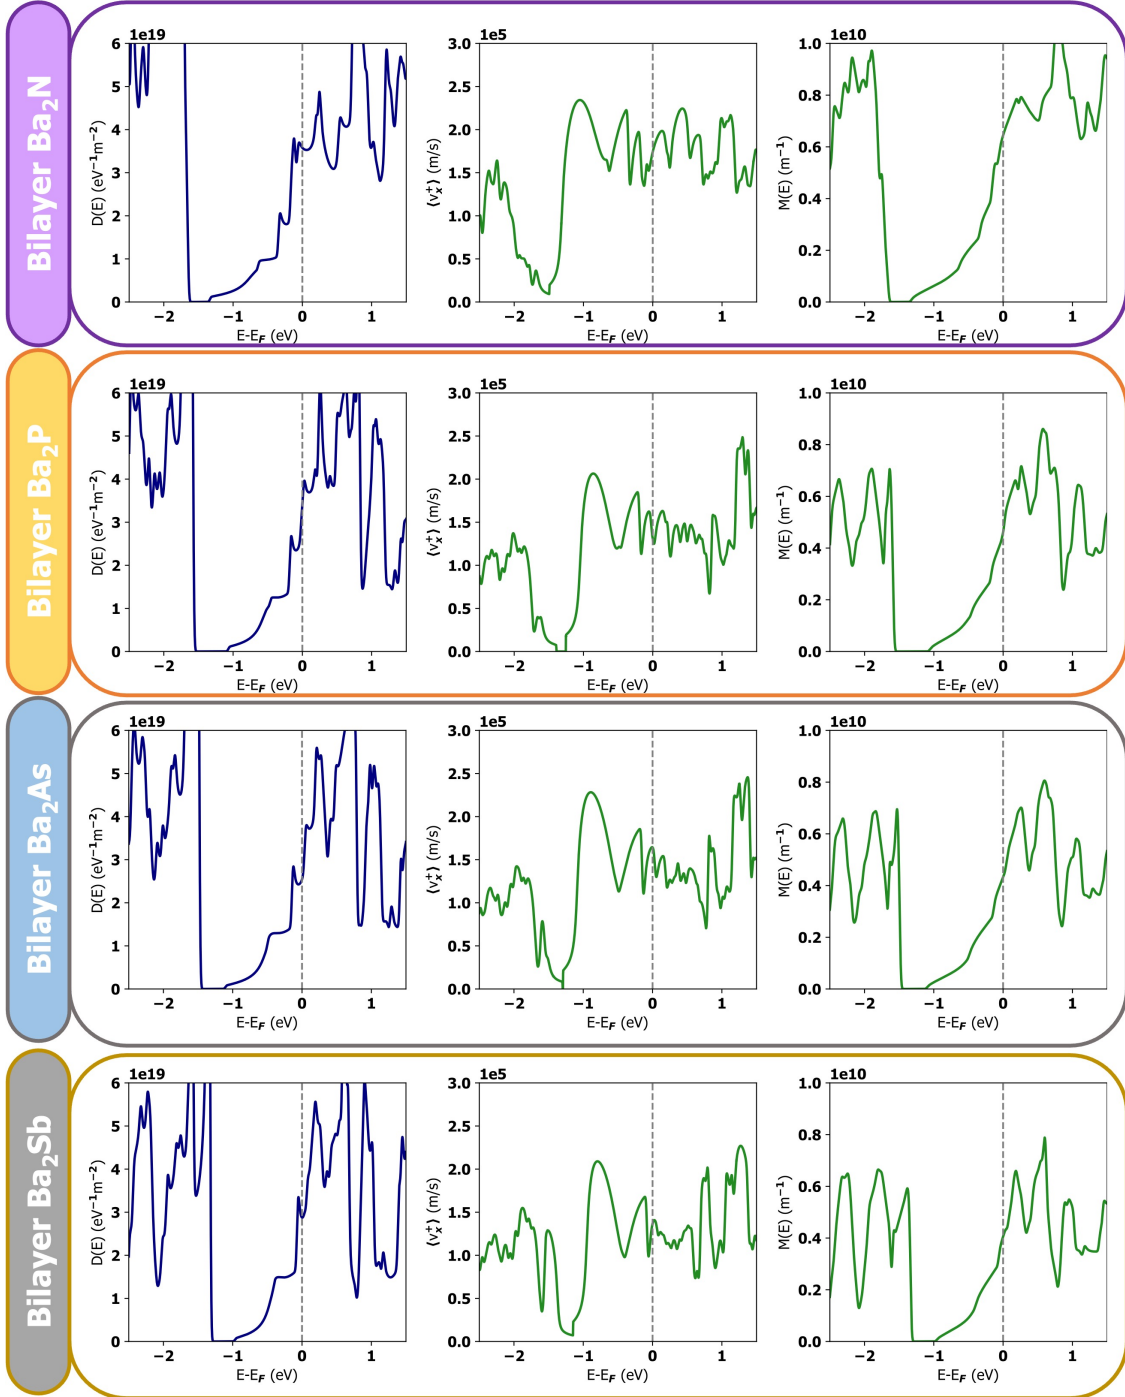

Fig. S 4: Calculated DOS (left), averaged velocity (center), and DOM (right) for bilayer  $\text{Ba}_2\text{N}$ ,  $\text{Ba}_2\text{P}$ ,  $\text{Ba}_2\text{As}$  and  $\text{Ba}_2\text{Sb}$ .

## 2 Transport properties

### 2.1 Rigorous electron-phonon scattering in monolayer $\text{Ca}_2\text{N}$

The value of the proportionality constant,  $k_0$ , was determined by matching the Landauer conductivity of monolayer  $\text{Ca}_2\text{N}$  to that obtained using `Perturbo`<sup>2</sup> (with  $\mathbf{k}$ - and  $\mathbf{q}$ - grids of  $200 \times 200 \times 1$ ), which captures the detailed electron-phonon scattering rates. The fitted value of  $k_0 = 9.13 \times 10^4 \text{ eV}^{-1} \text{ m}^{-2} \text{ s}$  was obtained for monolayer  $\text{Ca}_2\text{N}$ .

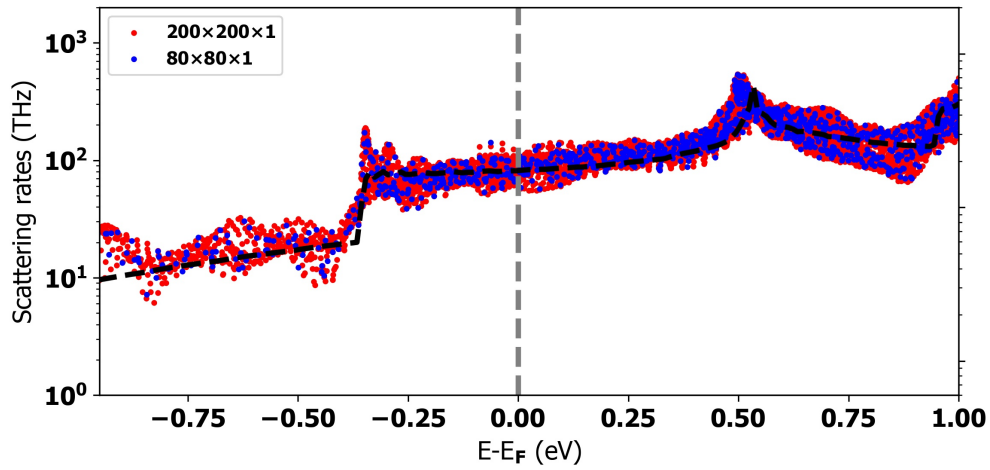

Fig. S 5: Electron-phonon scattering rates of  $\text{Ca}_2\text{N}$  monolayers using fine  $200 \times 200 \times 1$  and  $80 \times 80 \times 1$   $\mathbf{k}$ -point and  $\mathbf{q}$ -point grids. The dashed line shows the energy-dependent DOS scattering rates.



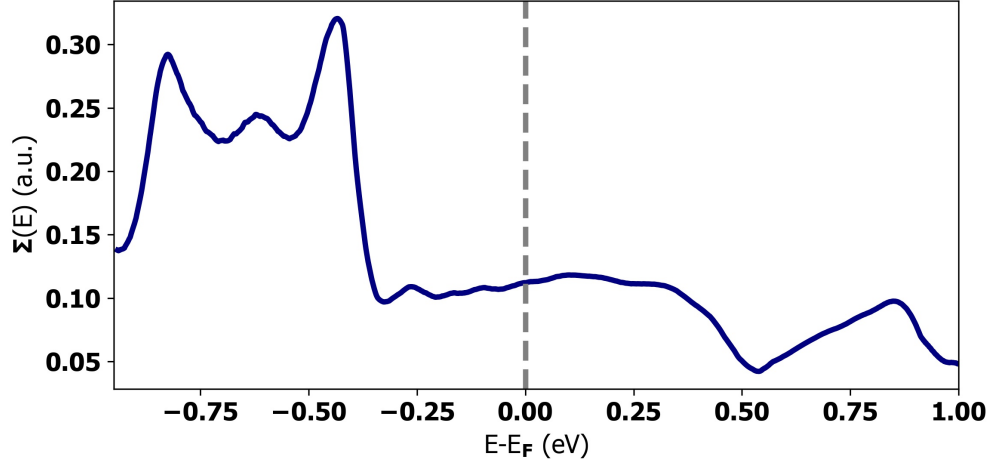

Fig. S6: Computed transport distribution function (TDF) of monolayer  $\text{Ca}_2\text{N}$  obtained from rigorous electron-phonon calculations. An abrupt drop in the TDF is observed near -0.4 eV, which corresponds to an increase in the DOS arising from the band edge of the upper surface band.

### 3 Lattice parameters, exfoliation energies, and work functions without dispersion correction

Table S 1: Calculated monolayer ( $a_m$ ) and bilayer ( $a_b$ ) lattice constants and interlayer distance of bilayer structures ( $c_b$ ) without the D3(BJ) dispersion correction.

|    | $a_m$ (Å) |      |      |    | $a_b$ (Å) |      |      |    | $c_b$ (Å) |      |      |
|----|-----------|------|------|----|-----------|------|------|----|-----------|------|------|
|    | Ca        | Sr   | Ba   |    | Ca        | Sr   | Ba   |    | Ca        | Sr   | Ba   |
| N  | 3.61      | 3.86 | 4.01 | N  | 3.61      | 3.86 | 4.03 | N  | 3.73      | 4.08 | 4.83 |
| P  | -         | 4.45 | 4.66 | P  | -         | 4.69 | 4.65 | P  | -         | 3.99 | 4.45 |
| As | -         | -    | 4.76 | As | -         | -    | 4.77 | As | -         | -    | 4.40 |
| Sb | -         | -    | 5.02 | Sb | -         | -    | 5.03 | Sb | -         | -    | 4.25 |

Table S 2: Exfoliation energies of electrenes without the D3(BJ) dispersion correction.

|    | $E_{\text{exfo}}$ (meV/Å <sup>2</sup> ) |    |    |
|----|-----------------------------------------|----|----|
|    | Ca                                      | Sr | Ba |
| N  | 70                                      | 54 | 38 |
| P  | -                                       | 42 | 31 |
| As | -                                       | -  | 30 |
| Sb | -                                       | -  | 27 |

## Supporting Information

Table S3: Monolayer and bilayer work functions ( $\Phi_m^{\text{monolayer}}$  and  $\Phi_m^{\text{bilayer}}$ ) without the D3(BJ) dispersion correction.

|    | $\Phi_m^{\text{monolayer}}$ (eV) |      |      |    | $\Phi_m^{\text{bilayer}}$ (eV) |      |      |
|----|----------------------------------|------|------|----|--------------------------------|------|------|
|    | Ca                               | Sr   | Ba   |    | Ca                             | Sr   | Ba   |
| N  | 3.58                             | 3.35 | 3.01 | N  | 3.40                           | 3.15 | 3.00 |
| P  | -                                | 2.98 | 2.68 | P  | -                              | 2.78 | 2.66 |
| As | -                                | -    | 2.62 | As | -                              | -    | 2.59 |
| Sb | -                                | -    | 2.48 | Sb | -                              | -    | 2.40 |

## 4 Electron localization function (ELF)

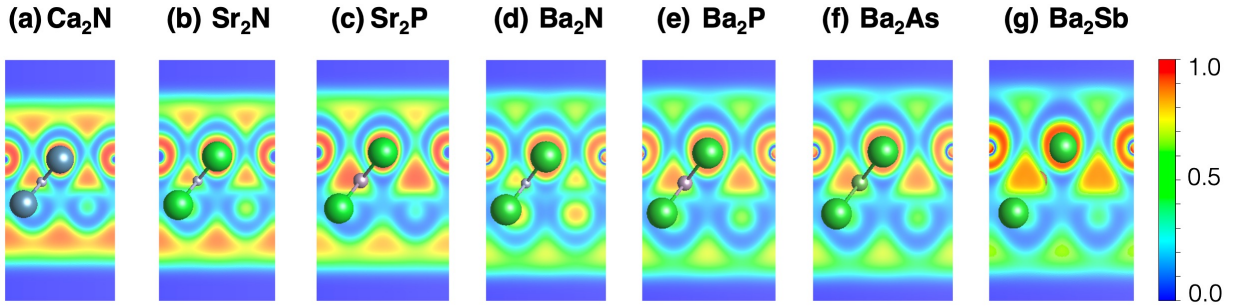

Fig. S7: Electron localization function (ELF) of monolayer electrenes. The ELF values are mapped onto a range between 0 and 1, where 1 corresponds to perfect localization and 0.5 is comparable to a uniform electron gas. The extent of electron localization at the surfaces is increased, compared to the central region of the atomic layer, for lighter elements.

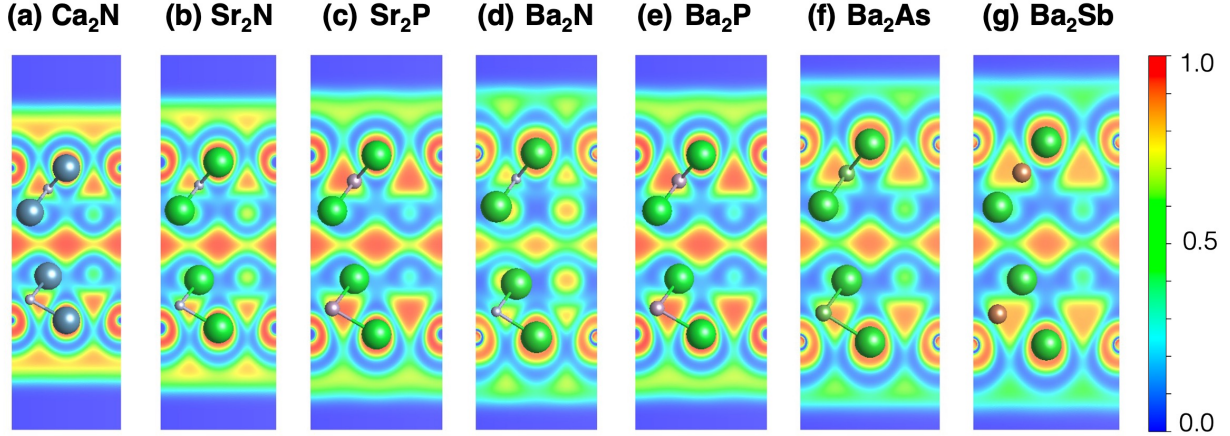

Fig. S8: Electron localization function (ELF) of bilayer electrenes. The colour bar indicates the range of values between 0 and 1. Similar to the monolayers, the surface states are more localized for lighter elements.

## 5 Crystal orbital Hamilton population (COHP)

Table S 4: Integrated crystal orbital Hamilton population (IpCOHP) for monolayer electrenes.

|    | $-\text{IpCOHP}^{\text{Total}} (\times 10^{-1})$ |      |      |    | $-\text{IpCOHP}^{s-s} (\times 10^{-1})$ |      |      |    | $-\text{IpCOHP}^{s-pz} (\times 10^{-1})$ |      |      |
|----|--------------------------------------------------|------|------|----|-----------------------------------------|------|------|----|------------------------------------------|------|------|
|    | Ca                                               | Sr   | Ba   |    | Ca                                      | Sr   | Ba   |    | Ca                                       | Sr   | Ba   |
| N  | 3.75                                             | 3.32 | 2.56 | N  | 1.09                                    | 0.94 | 0.95 | N  | 0.64                                     | 0.43 | 0.14 |
| P  | -                                                | 3.50 | 2.95 | P  | -                                       | 0.82 | 0.91 | P  | -                                        | 0.66 | 0.33 |
| As | -                                                | -    | 3.02 | As | -                                       | -    | 0.84 | As | -                                        | -    | 0.37 |
| Sb | -                                                | -    | 3.10 | Sb | -                                       | -    | 0.80 | Sb | -                                        | -    | 0.42 |

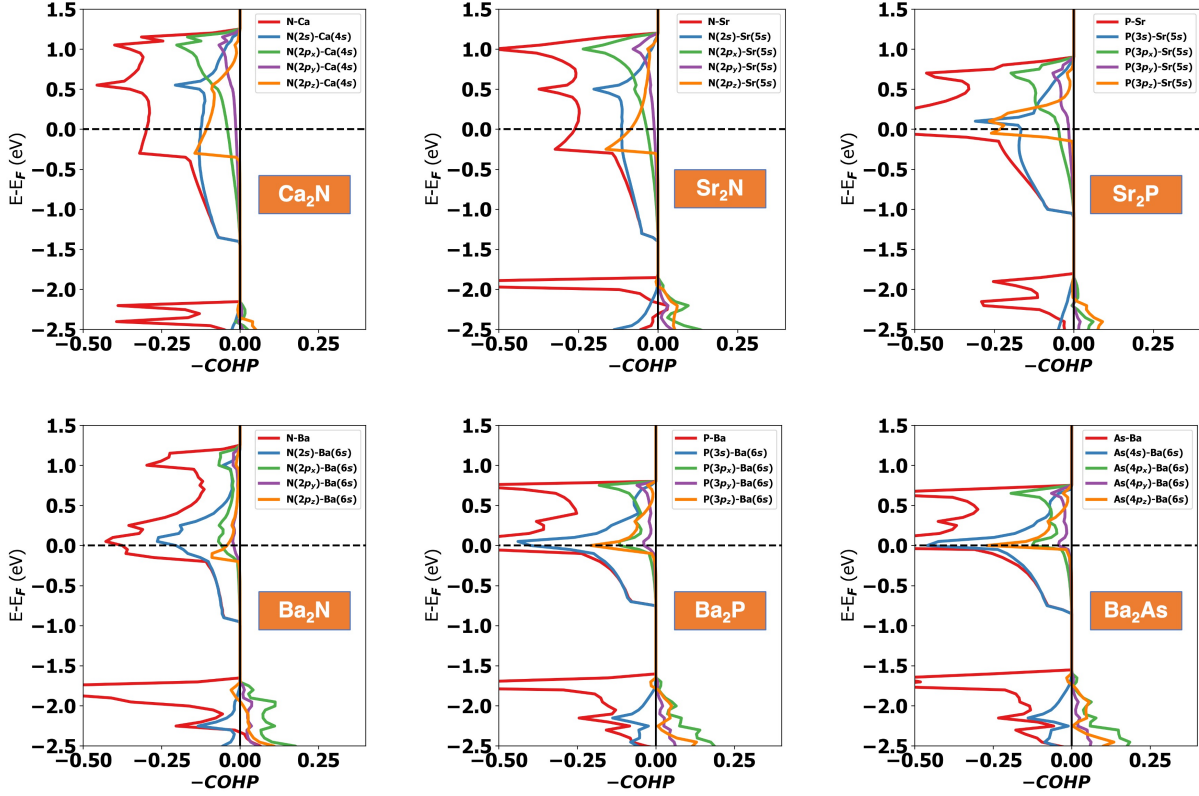

Fig. S9: Orbital-wise COHP plots for the monolayer electrenes.

## 6 Bader charges

Table S5: Calculated Bader charges of monolayer electrides. The left and right panels show the charges for the alkaline earth metals and the pnictogens, respectively.

|    | $Q_{\text{Bader}}^{\text{Metal}} (e)$ |      |      |    | $Q_{\text{Bader}}^{\text{Pnictogen}} (e)$ |      |      |
|----|---------------------------------------|------|------|----|-------------------------------------------|------|------|
|    | Ca                                    | Sr   | Ba   |    | Ca                                        | Sr   | Ba   |
| N  | 1.07                                  | 1.00 | 0.87 | N  | 2.14                                      | 2.00 | 1.75 |
| P  | -                                     | 1.10 | 0.94 | P  | -                                         | 2.21 | 1.89 |
| As | -                                     | -    | 0.94 | As | -                                         | -    | 1.88 |
| Sb | -                                     | -    | 0.96 | Sb | -                                         | -    | 1.93 |

## 7 Convergence tests

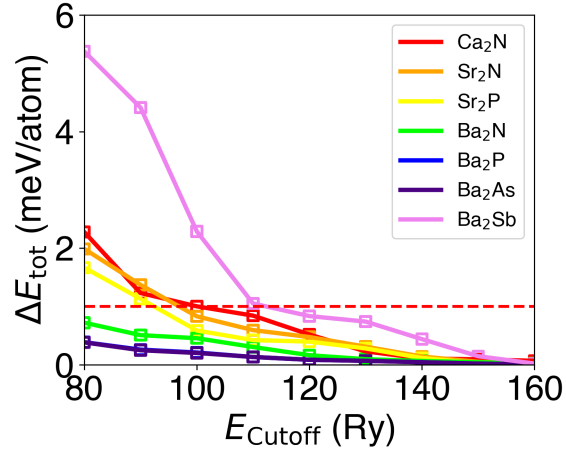

Fig. S10: Change in the total energy with respect to increasing cutoff energy for all studied monolayers.

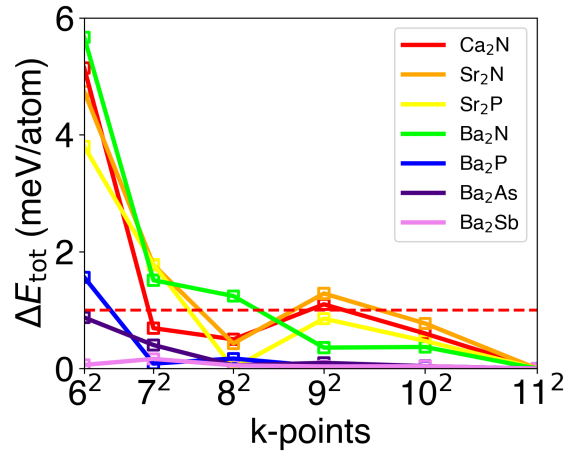

Fig. S11: Change in the total energy with respect to increasing  $\mathbf{k}$ -point density for all studied monolayers.

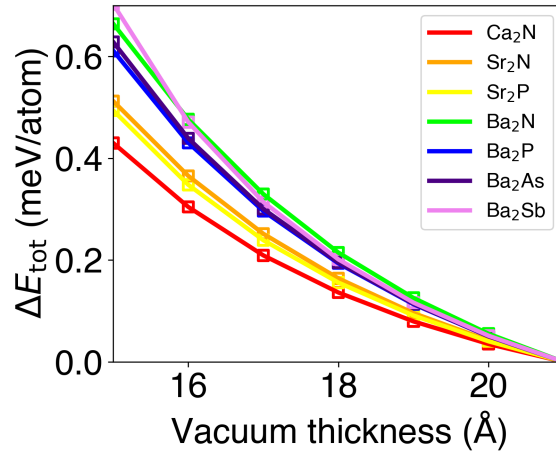

Fig. S12: Change in the total energy with respect to increasing vacuum thickness for all studied monolayers.

## 8 Band structure of Ca<sub>2</sub>N with experimental lattice constant

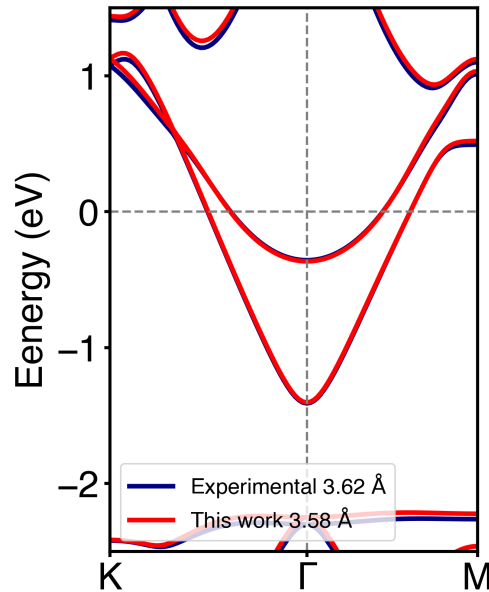

Fig. S13: Electronic structure of monolayer Ca<sub>2</sub>N with the experimental lattice constant<sup>3</sup> of 3.62 Å and the DFT-calculated lattice constant of 3.58 Å.

## 9 Phonon dispersion of electrenes

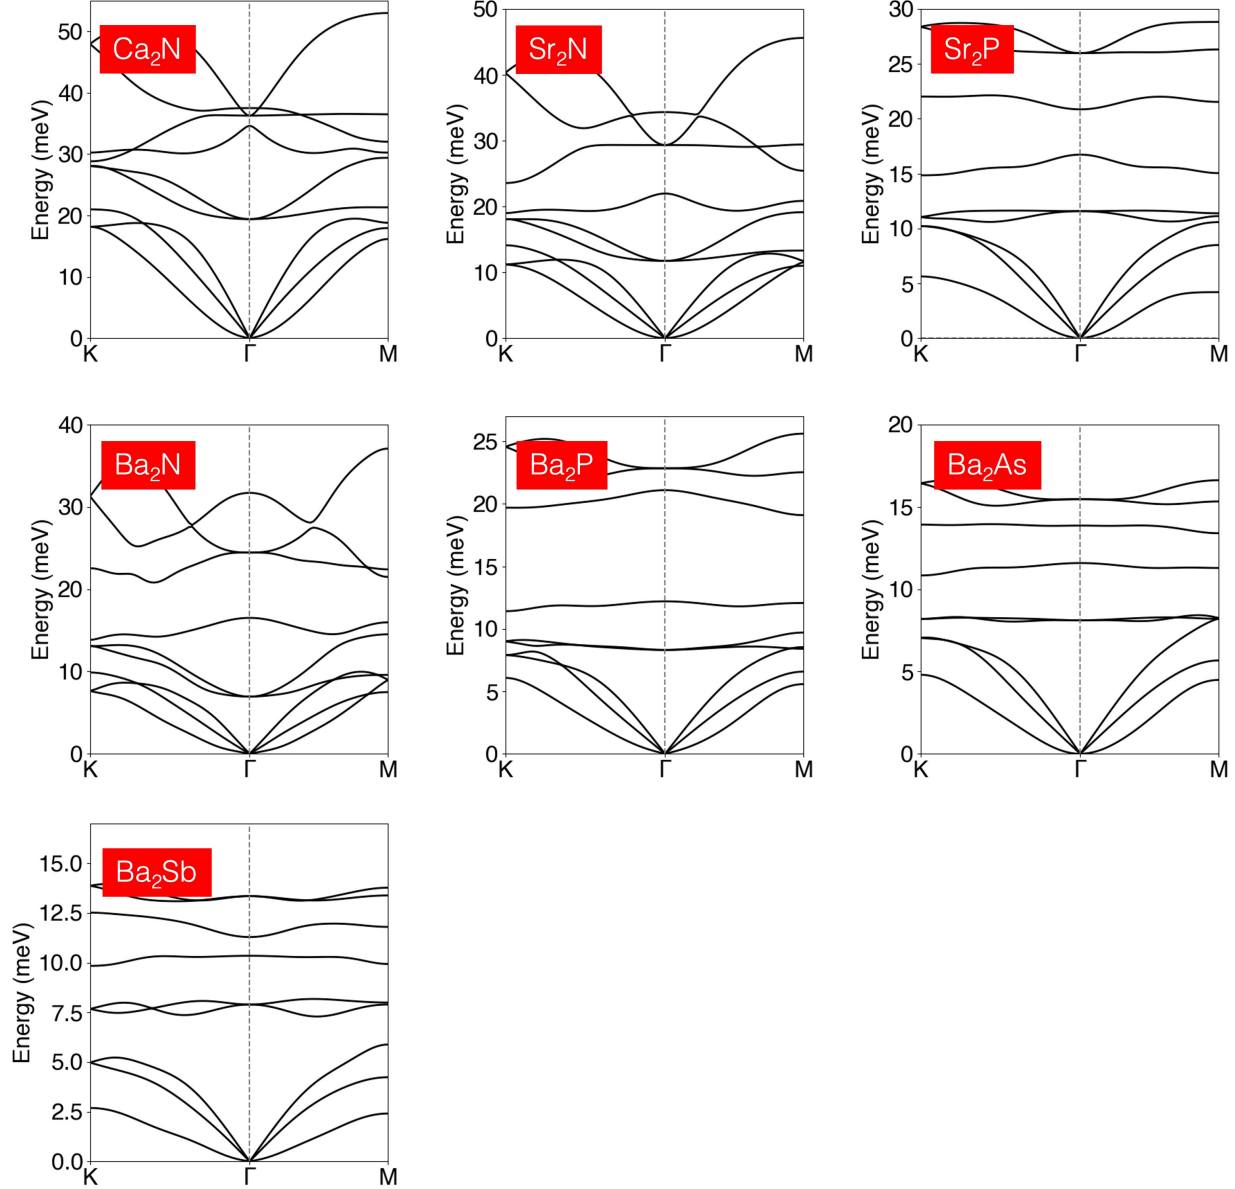

Fig.S 14: Phonon dispersion of monolayer electrenes. No negative phonon energies are observed, indicating the dynamical stability of these materials. Calculations were performed using DFPT, a  $q$ -grid of  $8 \times 8 \times 1$  for  $\text{Ca}_2\text{N}$  and  $\text{Sr}_2\text{N}$ ,  $10 \times 10 \times 1$  for  $\text{Ba}_2\text{N}$  and  $5 \times 5 \times 1$  for the rest of the materials. In all cases, a convergence threshold of  $10^{-20}$  was used for self-consistency calculations.

## 10 References

- (1) Rudderham, C.; Maassen, J. Ab initio thermoelectric calculations of ring-shaped bands in two-dimensional  $\text{Bi}_2\text{Te}_3$ ,  $\text{Bi}_2\text{Se}_3$ , and  $\text{Sb}_2\text{Te}_3$ : Comparison of scattering approximations. *Physical Review B* **2021**, *103*, 165406.
- (2) Zhou, J.-J.; Park, J.; Lu, I.-T.; Maliyov, I.; Tong, X.; Bernardi, M. Perturbo: A software package for ab initio electron–phonon interactions, charge transport and ultrafast dynamics. *Computer Physics Communications* **2021**, *264*, 107970.
- (3) Druffel, D. L.; Kuntz, K. L.; Woomer, A. H.; Alcorn, F. M.; Hu, J.; Donley, C. L.; Warren, S. C. Experimental Demonstration of an Electride as a 2D Material. *Journal of the American Chemical Society* **2016**, *138*, 16089–16094.
